# Supplementary material for: Functional Disability and Multidimensional Hardship Among Cancer Survivors in the United States: A Nationally Representative Study
Source: Research Square preprint supplement (doi:10.21203/rs.3.rs-7437296/v1), 2025-09-15
Supplement: Supplementary file 1 [file 7e20bfdd0f9329abc16513d0.docx]

**Supplemental Online Content**

**eTable 1.** Baseline characteristics of cancer survivors and the general population in the unweighted sample. Characteristics include sociodemographic variables, insurance status, and disability type. P-values were derived using chi-square tests for categorical variables and the Kruskal–Wallis test for continuous variables.

**eTable 2.** Survivor hardship stratified by disability type and Medicaid expansion status among low-income adults. Estimates reflect changes in hardship risk before and after Medicaid expansion across non-expansion and expansion states. Difference-in-differences values represent the net change in disability-related hardship risk attributable to Medicaid expansion. Statistical significance set at p < 0.05.

**eTable 3.** Adjusted probability of survivorship hardship by disability type and sex. Sex-based contrasts (female vs. male) were calculated using predictive margins derived from multivariable logistic regression models adjusted for relevant sociodemographic covariates. Estimates are presented with 95% confidence intervals and p-values.

**eTable 1.** Baseline characteristics of cancer survivors and the general population (unweighted sample).

| **Characteristics** | **Cancer survivors**  **(n= 26 864, 1.0%)** | **General population**  **(n = 2 564 639, 99.0%)** | **p-value1** |
| --- | --- | --- | --- |
| **Age (y) Median [IQR]** | 62 [53–73] | 58 [41-69] | <0.001 |
| **Age, n (%)** |  |  | <0.001 |
| < 65 years | 8,704 (32.4) | 1 618 970 (63.0) |  |
| ≥ 65 years | 18,160 (66.4) | 897 465 (35.1) |  |
| **Sex, n (%)** |  |  | <0.001 |
| Male | 9,241 (34.4) | 1,184,863 (46.2) |  |
| Female | 17,622 (65.6) | 1,379,775 (53.8) |  |
| **Ethnicity, n (%)** |  |  | <0.001 |
| White | 21,840 (81.3) | 1,940,948 (75.7) |  |
| Black | 1,746 (6.5) | 200,041 (7.8) |  |
| Asian | 483 (1.8) | 64,115 (2.5) |  |
| Native American | 537 (2.0) | 41,034 (1.6) |  |
| Hispanic | 1424 (5.3) | 248,769 (9.7) |  |
| Other | 806 (3.0) | 69,245 (2.7) |  |
| **Area, n (%)** |  |  | <0.001 |
| Urban | 15,930 (59.3) | 1,872,186 (73.0) |  |
| Rural | 7,092 (26.4) | 692,452 (23.0) |  |
| **Education, n (%)** |  |  | <0.001 |
| < High school | 1, 558(5.8) | 182,089 (7.1) |  |
| High school/some college | 14,640 (54.5) | 1,379,775 (53.8) |  |
| ≥ College degree | 10,638 (39.6) | 1,002,773 (39.1) |  |
| **Annual household income ($), n (%)** |  |  | <0.001 |
| < 25 000 | 3,331 (12.4) | 348,790 (13.6) |  |
| 25 000–74 999 | 5,399 (20.1) | 556,526 (21.7) |  |
| > 75 000 | 3,456 (12.9) | 477,022 (18.6) |  |
| **Marital status, n (%)** |  |  | <0.001 |
| Married | 13, 728 (51.1) | 1,246,414 (48.6) |  |
| Not married | 13,136 (49.9) | 1,318,224 (51.3) |  |
| **Health insurance status, n (%)** |  |  | <0.001 |
| Uninsured | 107 (0.4) | 41,163 (1.8) |  |
| Government insurance | 8,220 (30.6) | 400,083 (15.6) |  |
| Private insurance | 3,331 (12.4) | 402,648 (15.7) |  |
| **Disability, n (%)** |  |  | <0.001 |
| Self-care disability | 1,719 (6.4) | 102,585 (4.0) |  |
| Mobility disability | 7,522 (28.0) | 407,777 (15.9) |  |
| Cognitive disability | 3,465 (12.9) | 269,287 (10.5) |  |

1P-values are derived using chi-square tests for categorical variables and Kruskal–Wallis test for continuous variables**.**

**eTable 2.** Survivor Hardship by Disability Type and Medicaid Expansion Status Among Low-Income Adults

| **Disability type** | **Hardship risk**  **Non expansion (%) (No → Yes)** | **Hardship risk**  **Expansion (%)**  **(No → Yes)** | **Disability Gap Non-expansion (%)** | **Disability Gap Expansion (%)** | **Difference-in-Differences**  **(p-value)*** |
| --- | --- | --- | --- | --- | --- |
| **Self-care** | 19.6 → 37.2 | 16.9 → 31.7 | +17.6 | +14.8 | -2.8 (p = 0.60) |
| **Mobility** | 15.4 → 29.6 | 13.2 → 25.4 | +14.2 | +12.2 | -2.0 (p = 0.56) |
| **Cognitive** | 16.6 → 36.7 | 13.8 → 32.1 | +20.1 | +18.3 | -1.8 (p = 0.67) |

*Statistical significance set at p < 0.05

**eTable 3.** Adjusted probability of survivor hardship by disability type and sex.

| **Disability type** | **Sex/Contrast** | **Adjusted Pr of hardship** | **95% CI / p value** |
| --- | --- | --- | --- |
| **Self‑care** | Female | 0.464 | 0.452 – 0.476 |
| Male | 0.421 | 0.408 – 0.434 |
| Sex difference* (F – M) | +0.044 | p < 0.001 |
| **Mobility** | Female | 0.190 | 0.184 – 0.195 |
| Male | 0.207 | 0.199 – 0.214 |
| Sex difference* (F – M) | –0.017 | p = 0.0004 |
| **Cognitive** | Female | 0.510 | 0.503 – 0.518 |
| Male | 0.474 | 0.466 – 0.483 |
| Sex difference* (F – M) | +0.036 | p < 0.001 |

*Sex differences calculated as female – male.
